# Supplementary material
Source: PubMed Central journal article supplement (PMC1360589)

A.

|     |                                                                           |        |
|-----|---------------------------------------------------------------------------|--------|
| 1   | MRFNLFQAA.....SRLTYSRNGKLLTRGSLK.....ATSB                                 | Enigma |
| 1   | .....SQC.....ATTA.....AAR                                                 | ACAD-9 |
| 1   | .....TSSSWVIQNVGTLQLTGPKGDLPNNFETMWRHTIQSTV.....AGNSLRCRIAG               | C67461 |
| 33  | SLLDSQHQAATTEQRAEVSSEPEQDKLPTRP.....AKNPFQGVVKELLAYPEVPRDEMAQLE           | Enigma |
| 36  | AC.....RGLVSTANRQRISSPYRAFAKELFGLKIKKKEVFPPEVSDDELNEIN                    | ACAD-9 |
| 54  | SP.....KLGESNRSKELASENSP.....MNTFRSSLVSSGVPPYDVTAEQKELTY                  | C67461 |
| 99  | NS.....PKNY.....VEPRETEETSP.....ETRQLGLSLVSTDTSEKRYQWSASLMASPEQSTQIN      | Enigma |
| 99  | QF.....PVEKFFTEEVDSKIDREGKIDPEETIKKSLGLFGLDVPSEYGGLOFSNITMYRLEQETSMOOS    | ACAD-9 |
| 105 | SLTDGERRFSDVNAARNDANSKIDPITSTAMELQAGTGVPSFQGLQNTQIQRLEALVGVNDLQ           | C67461 |
| 159 | VTLGIDTRVVVDLREV.....GTPDQQRVQLDADKLG.....TEAIYEIIPPEEDYFNTIETLPEY        | Enigma |
| 138 | IIVTLAHDALG.....KGLDQTEQKAKYLPKLASERAAAFQLTEP.....ASQSDAASIRSRATLSEDK     | ACAD-9 |
| 175 | LGIITGADHSG.....FKGLYSTPECKKYLPKVAEQVYAALATEP.....SGSDASIRSRRAVRSAGS      | C67461 |
| 222 | QKWLNQESFVICTPDERQLLVLAADQPNV.....PVLGRQTTLSVDSQEGVRLQEKHATFDQRKAEI       | Enigma |
| 203 | KHYLNGSKMMITNGGANITVFAATEVDS.....DQSVKDKTAFIVERDQGGVINOAPEDKLRIDRNT       | ACAD-9 |
| 240 | KHYLNGSKMIS.....NGGAEITVFAATEVDPKTSFKADKMTAFIVERDQGGVINOAPEDKLRIDRNT      | C67461 |
| 291 | RYVHFEMKLGEDQVGLPHGNRYSEQLVRSRLRGLSLVLSLAKKLNELADITLVITDGVQLDLE           | Enigma |
| 271 | CEVHFENTKPVENLGEVGGQFKVAMNINLSGRFSMQSVAQGLKRLIENTEYACTRQDKRKRSEFG         | ACAD-9 |
| 309 | AEVTEQVKPIPEINVLQESGGQFKVAMNINNSRFSMQATLSTGMKQDQATEHANNRVSDQKLNYS         | C67461 |
| 361 | LTRIMSRAMCSVYAMESMLVLTAGLDEFRAQDVTLESAITVSTLRQVYVAIDQNVGVVQPKSLLSQ        | Enigma |
| 341 | LIGERLMAQKAYMESMTVLTAGLDDPFPDCSIEAAMQVSSSEAAQCVSEALQILGGLQVTRDY           | ACAD-9 |
| 379 | SLDEKADNIIQVATESMAFFITSONMIA.....SKDYHLEAATSAYASESAWVYVDEADILGGQVYVND     | C67461 |
| 431 | TT.....GQDADQDQESLDTLQFIALTGLQHAQAMNIGVRSRNF.....FIDGHEFKLQDNNSIDNPK      | Enigma |
| 411 | PYRRLRDRILFEQTNLRMIALTGLQHAQRIILIRIHELQAKVSTVMDTVRRRDRSL.....GRG          | ACAD-9 |
| 448 | QLRVRDRIIRIFEGTNLRLRALTGLQHAQSHLQELQAFKNSA.....LGLTEASRRA.....AST         | C67461 |
| 500 | TKMQ.....LSEH.....VHPSLEAAQCI.....SVARLQMAVELMFTKHQNAVVEQSEMORLAEVGTLVAMV | Enigma |
| 479 | MDG.....LIDNHGVHPSLQADSANFENTICYRTVEILLRQKTEMEQLVKKRMANLNLIDYAMV          | ACAD-9 |
| 514 | MSGGTQLSGH.....VJGELPYAKTAHCIDYSGSVEILLRYNANVINGQLITRLANAAIDYAMV          | C67461 |
| 564 | SVARASRSYIQLADHELLTATLSEEDRVRRTLCTEITGGQFVNIDNVLVRLSKQVAKSKDYFA           | Enigma |
| 546 | VLBRASRSIQLRNQDQVQLANTFQVAYLQNLFLSLQDKLQPE.....NDEQKKVSDQLKRAMIC          | ACAD-9 |
| 581 | TQSRSSAVNLTQDHELNMKALTIQASRVVKNLQAAATSSPHRSNEKSTIADTLENGDVT               | C67461 |
| 632 | VHPLIFIF                                                                  | Enigma |
| 614 | AHPLDITC                                                                  | ACAD-9 |
| 649 | TGILDPI                                                                   | C67461 |

B.

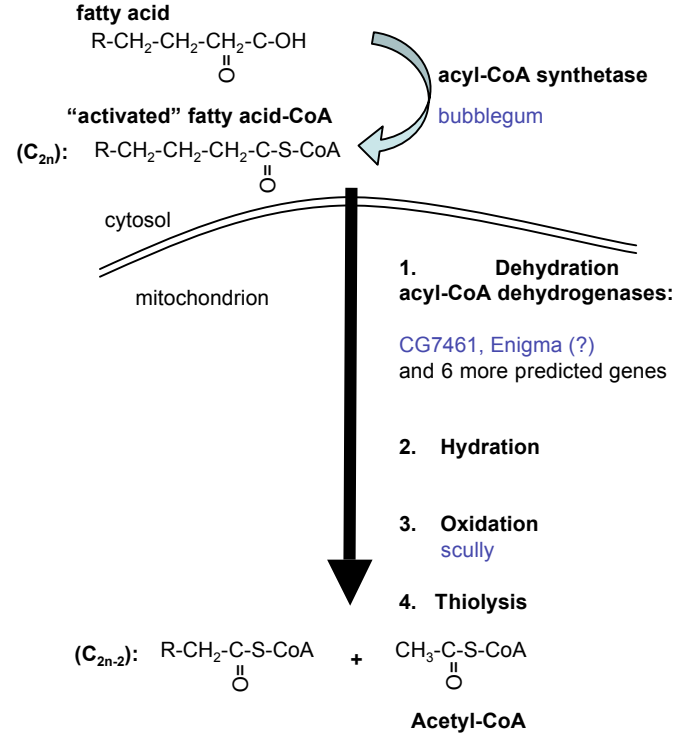

Supplement: pnas_0510564103_1.pdf [file pnas_0510564103_1.pdf]
