# Supplementary material
Source: PubMed Central journal article supplement (PMC1360589)

A.

| Gene    | Symbol         | Annotated function                           | Fold Increase | P-value |
|---------|----------------|----------------------------------------------|---------------|---------|
| CG6658  | <i>Ugt86Di</i> | UDP-Glycosyltransferase                      | 4.14          | 0.047   |
| CG4181  | <i>GstD2</i>   | Glutathione-S transferase                    | 2.85          | 0.044   |
| CG12766 |                | Aldehyde reductase                           | 2.06          | 0.013   |
| CG5001  |                | Chaperone (heat-shock protein)               | 2.04          | 0.028   |
| CG10091 | <i>GstD9</i>   | Glutathione-S transferase                    | 1.75          | 0.014   |
| CG13270 | <i>Ugt36Ba</i> | UDP-Glycosyltransferase                      | 1.74          | 0.012   |
| CG10843 | <i>Cyp4p3</i>  | Steroid metabolism (cytochrome P450)         | 1.68          | 0.042   |
| CG18578 | <i>Ugt86Da</i> | UDP-Glycosyltransferase                      | 1.64          | 0.006   |
| CG17530 | <i>GstE6</i>   | Glutathione-S transferase                    | 1.53          | 0.003   |
| CG5579  |                | Glutathione transferase                      | 1.47          | 0.026   |
| CG1469  | <i>Fer2LCH</i> | Ferric iron binding                          | 1.41          | 0.017   |
| CG4421  | <i>GstD8</i>   | Glutathione-S transferase                    | 1.39          | 0.027   |
| CG4460  | <i>Hsp22</i>   | Chaperone                                    | 1.39          | 0.049   |
| CG1753  | <i>GstE71</i>  | Glutathione-S transferase                    | 1.37          | 0.032   |
| CG11466 | <i>Cyp9f2</i>  | Electron transport (cytochrome P450)         | 1.36          | 0.002   |
| CG10242 | <i>Cyp6a23</i> | Steroid metabolism (cytochrome P450)         | 1.35          | 0.045   |
| CG4423  | <i>GstD6</i>   | Glutathione-S transferase                    | 1.35          | 0.023   |
| CG8256  |                | Glycerol-3-phosphate dehydrogenase           | 1.73          | 0.037   |
| CG11661 | <i>Nc73EF</i>  | Glutarate dehydrogenase                      | 1.68          | 0.000   |
| CG11709 | <i>PGRP-SA</i> | Peptidoglycan receptor                       | 1.68          | 0.016   |
| CG9743  |                | stearyl-CoA 9-desaturase *                   | 1.56          | 0.024   |
| CG5889  | <i>Mdh</i>     | Malate dehydrogenase                         | 1.52          | 0.016   |
| CG4630  |                | Carnitine transporter *                      | 1.51          | 0.002   |
| CG17608 | <i>fu12</i>    | 1-acylglycerol-3-phosphate O-acyltransferase | 1.50          | 0.037   |
| CG4501  | <i>bgm</i>     | Long-chain-fatty-acid-CoA ligase *           | 1.41          | 0.015   |
| CG12177 |                | Hydrolase                                    | 1.40          | 0.038   |
| CG31705 |                | Unknown                                      | 1.40          | 0.042   |
| CG5186  | <i>slim</i>    | Galactose oxidase                            | 1.38          | 0.005   |
| CG11055 |                | Triacylglycerol lipase *                     | 1.36          | 0.003   |
| CG9331  |                | L-serine biosynthesis                        | 2.46          | 0.045   |
| CG1743  |                | Glutamine synthetase 2                       | 1.75          | 0.037   |
| CG18658 | <i>Asph</i>    | Aspartyl b-hydroxylase                       | 1.56          | 0.031   |
| CG2194  | <i>Reg-3</i>   | Dihydropyrimidine dehydrogenase              | 1.51          | 0.006   |
| CG16747 | <i>Oda</i>     | Ornithine decarboxylase inhibitor            | 1.51          | 0.044   |
| CG1697  | <i>rho-4</i>   | Serine-type peptidase                        | 1.45          | 0.009   |

\* directly involved in fatty acid metabolism

B.

| Gene    | Symbol             | Annotated function           | Fold Decrease | P-value |
|---------|--------------------|------------------------------|---------------|---------|
| CG9006  | <i>Egm</i>         | Acyl-CoA dehydrogenase *     | 6.59          | 0.000   |
| CG18645 |                    | Enoyl Coenzyme A hydratase * | 2.14          | 0.022   |
| CG7766  |                    | Glycogen metabolism          | 1.79          | 0.011   |
| CG31731 |                    | Coenzyme metabolism          | 1.63          | 0.010   |
| CG9659  | <i>egh</i>         | Beta-1,4-mannosyltransferase | 1.56          | 0.039   |
| CG18402 | <i>InR</i>         | Insulin-receptor activity    | 1.55          | 0.010   |
| CG3902  |                    | Acyl-CoA dehydrogenase *     | 1.52          | 0.003   |
| CG9343  | <i>Trl</i>         | transcription factor         | 1.95          | 0.005   |
| CG32217 | <i>Su(Tpl)</i>     | transcription factor         | 1.76          | 0.010   |
| CG12690 | <i>CHES-1-like</i> | transcription factor         | 1.54          | 0.005   |
| CG17334 | <i>lin-28</i>      | transcription regulation     | 1.48          | 0.034   |
| CG31453 |                    | transcription cofactor       | 1.45          | 0.036   |
| CG4399  | <i>east</i>        | Carboxypeptidase A           | 1.56          | 0.001   |

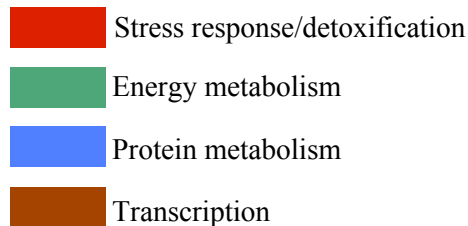

Supplement: pnas_0510564103_6.pdf [file pnas_0510564103_6.pdf]
