# Supplementary material
Source: PubMed Central journal article supplement (PMC1360589)

A.

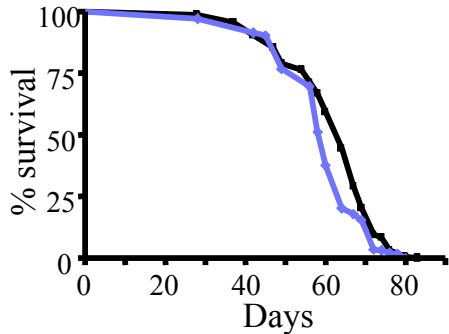

B.

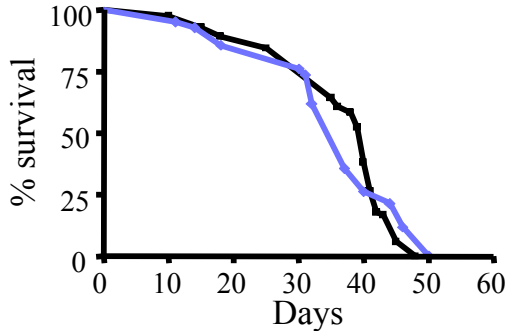

C.

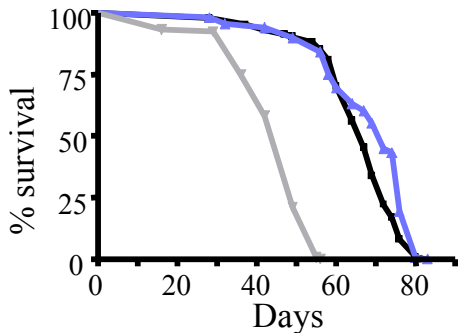

D.

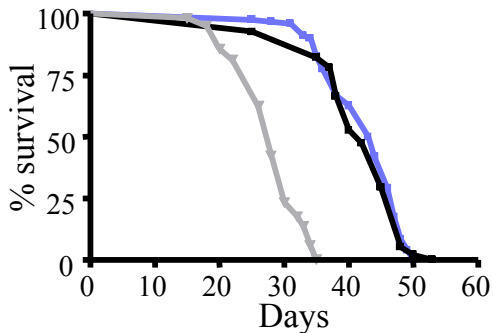

Supplement: pnas_0510564103_2.pdf [file pnas_0510564103_2.pdf]

A.

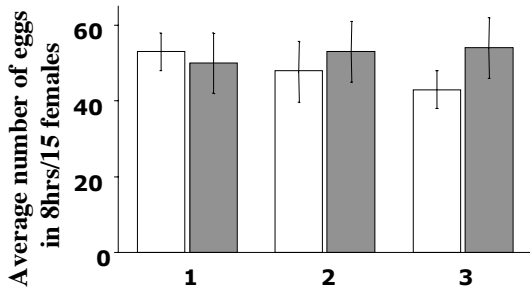

B.

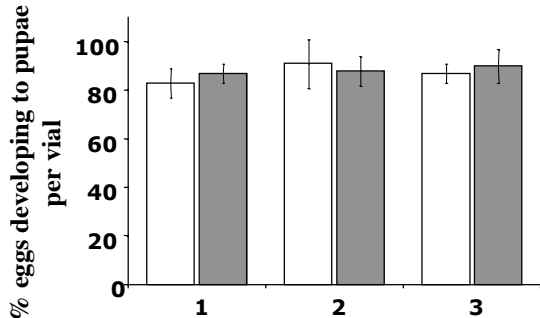

Supplement: pnas_0510564103_3.pdf [file pnas_0510564103_3.pdf]

A.

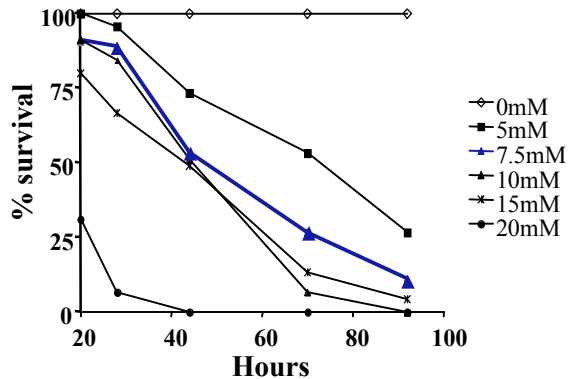

B.

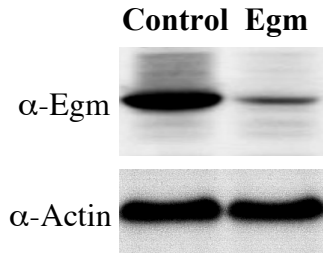

Supplement: pnas_0510564103_4.pdf [file pnas_0510564103_4.pdf]

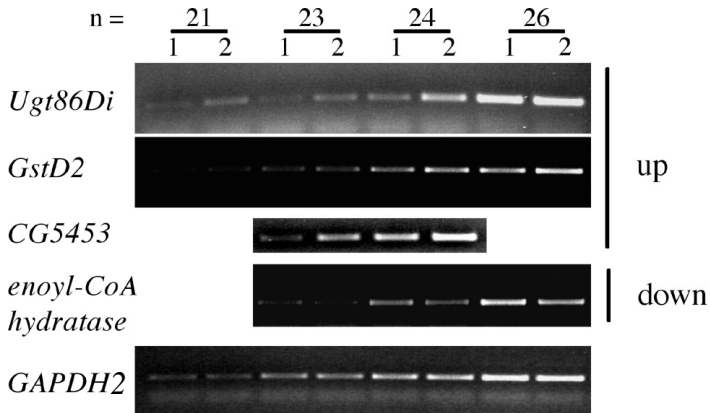

**n** = number of PCR cycles      **1**: Control RNAi    **2**: Egm RNAi

Supplement: pnas_0510564103_5.pdf [file pnas_0510564103_5.pdf]
